# Supplementary material
Source: HighWire-hosted journal article supplement (https://svn.bmj.com/content/svn-2024-003535)
Supplement: inline-supplementary-material-2 [file inline-supplementary-material-2.pdf]

**Supplementary Table 2** Comparison of modes of arrival at the hospital and emergency stroke treatment effectiveness during and after the coronavirus disease 2019 pandemic

|                                                                                         | COVID-19 pandemics    | After the COVID-19 pandemic | <i>P</i> -value |
|-----------------------------------------------------------------------------------------|-----------------------|-----------------------------|-----------------|
| Number of patients                                                                      | 12,167                | 9716                        |                 |
| Age (years)                                                                             | 66.1±11.8             | 66.41±11.5                  | 0.027           |
| The form of transportation to the hospital                                              |                       |                             | <0.001          |
| Self-transported to the hospital (%)                                                    | 10980 (90.2)          | 9090 (93.6)                 |                 |
| Emergency medical service (%)                                                           | 864 (7.1)             | 525 (5.4)                   |                 |
| Other forms                                                                             | 323 (2.6)             | 100 (1.1)                   |                 |
| Received intravenous thrombolysis (%)                                                   | 2080 (17.1)           | 1216 (12.5)                 | <0.001          |
| Door-to-needle time (min)                                                               | 34.0 [26.0, 50.0]     | 32.0 [26.0, 46.0]           | 0.035           |
| Received thrombectomy (%)                                                               | 743 (6.1)             | 404 (4.2)                   | <0.001          |
| Door-to-puncture time (min)                                                             | 92.0 [60.0, 140.0]    | 93.5 [60.0, 142.0]          | 0.896           |
| Successful reperfusion achieved during interventional therapy (mTICI grade 2b or 3) (%) | 607 (89.7)            | 300 (90.4)                  | 0.808           |
| NIHSS score at discharge                                                                | 2.0 [0.0, 4.0]        | 1.0 [0.0, 3.0]              | <0.001          |
| Onset-to-door time >3 hours (%)                                                         | 9601 (78.9)           | 7850 (80.8)                 | 0.001           |
| Onset-to-door time (min)                                                                | 697.0 [240.0, 1632.0] | 889.0 [241.0, 2852.0]       | <0.001          |

Values are presented as n (%), mean±standard deviation, or median [Q1–Q3].  
COVID-19, Coronavirus Disease 2019; NIHSS, National Institutes of Health Stroke Scale; mTICI, modified Thrombolysis in Cerebral Infarction; mRS, Modified Rankin Scale.
